# Supplementary material for: The dual distinct role of telomerase in repression of senescence and myofibroblast differentiation
Source: PubMed Central journal article supplement (PMC8312426; doi:10.18632/aging.203246), 2021-07-12
Supplement: aging-13-203246-s001.pdf [file aging-13-203246-s001.pdf]

## SUPPLEMENTARY TABLES

**Supplementary Table 1. Sequences of oligonucleotides used for siRNA transfection.**

| siRNA         | Primers # |                             | Sequences                |
|---------------|-----------|-----------------------------|--------------------------|
| <i>YB-1</i>   | #1        | Sense                       | 5'-UGACACCAAGGAAGAUGUAUU |
|               |           | Antisense                   | 5'-UACAUCUUCUUGGUGUCAUU  |
|               | #2        | Sense                       | 5'-GUGAGAGUGGGGAAAAGAAUU |
|               |           | Antisense                   | 5'-UUCUUUUCCCCACUCUCACUU |
| <i>CDKN2A</i> | Sense     | 5'-CGCACCGAAUAGUUACGGUT-3'  |                          |
| <i>SIRT1</i>  | Antisense | 5'-ACCGUAUUCGGUGGUGCGTT-3'  |                          |
|               | Sense     | 5'-GGGUCUCCCUCAAAGUAAtt-3'  |                          |
|               | Antisense | 5'-UUACUUUGAGGGAAGACCCaa-3' |                          |

**Supplementary Table 2. Primer sets for ChIP assay (*ACTA2*).**

| ChIP <i>ACTA2</i> | Primer sets | Sequences               |
|-------------------|-------------|-------------------------|
| 1                 | Forward     | TTCCTTTGAAACACTGACACTTC |
|                   | Reverse     | AGACATTAGCAACCAGGATGG   |
| 2                 | Forward     | TTCTTTATTTTCCCCACAAAAC  |
|                   | Reverse     | GAGCAGCCTGTTTTGGAAAG    |
| 3                 | Forward     | GATCCACATCCCTTCAATTAGC  |
|                   | Reverse     | AATGGGCTGGACATAGATGG    |
| 4                 | Forward     | CAGATGCAATCAGCGAACAG    |
|                   | Reverse     | ACTCCCATGGTGATTTCTGC    |
| 5                 | Forward     | GTTCTGTGCGGTGGGAAC      |
|                   | Reverse     | GCACCGAAGCAGTGGTAAAG    |
| 6                 | Forward     | GCCTCCAGAAGCTCATTCAG    |
|                   | Reverse     | GACAGGAATTGAAGCGGAAG    |

**Supplementary Table 3. Primer sets for ChIP assay (*CDKN2A*).**

| ChIP <i>CDKN2A</i> | Primer sets | Sequencing               |
|--------------------|-------------|--------------------------|
| 1                  | Forward     | ACTGGGTCTACAAGGTTTAAAGTC |
|                    | Reverse     | CTGGGAGACAAGAGCGAAAC     |
| 2                  | Forward     | TCGGAGTCTCATTCTGTCACC    |
|                    | Reverse     | TGGCTTGCAATCTTGTTTTG     |
| 3                  | Forward     | GTGCTGGGATTACAGGTGTG     |
|                    | Reverse     | TGCACAGTGATCCAAAGACC     |
| 4                  | Forward     | GAGAAATGTGAGAAGTGTGAAGG  |
|                    | Reverse     | CCCCTCAACCCTTGATTTTC     |
| 5                  | Forward     | CCGACTCTCCAAAAGGAATC     |
|                    | Reverse     | GTTTCCTTCCCGCGATAC       |
